# Supplementary material
Source: PubMed Central journal article supplement (PMC2567493)
Supplement: 0803124105_0803124105SI.pdf [file 0803124105_0803124105SI.pdf]

# Supporting Information

Johansson *et al.* 10.1073/pnas.0803124105

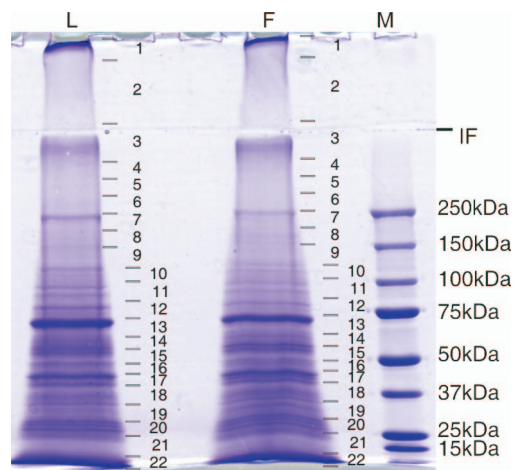

**Fig. S1.** PAGE of the firm and a loose mucus layers as used for proteomics identification. Loose (L) and firm (F) mucus was reduced and separated on a 4–12% SDS/PAGE and stained with Coomassie blue. A complete proteomic analysis of each lane was performed after dividing the lanes in 22 bands as indicated by the numbered lines. These bands were excised, trypsin-digested, and analyzed by nanoLC-ICR-MS/MS. The sizes of the molecular mass marker (M) are shown and the interface between stack and separating gel is indicated with IF.

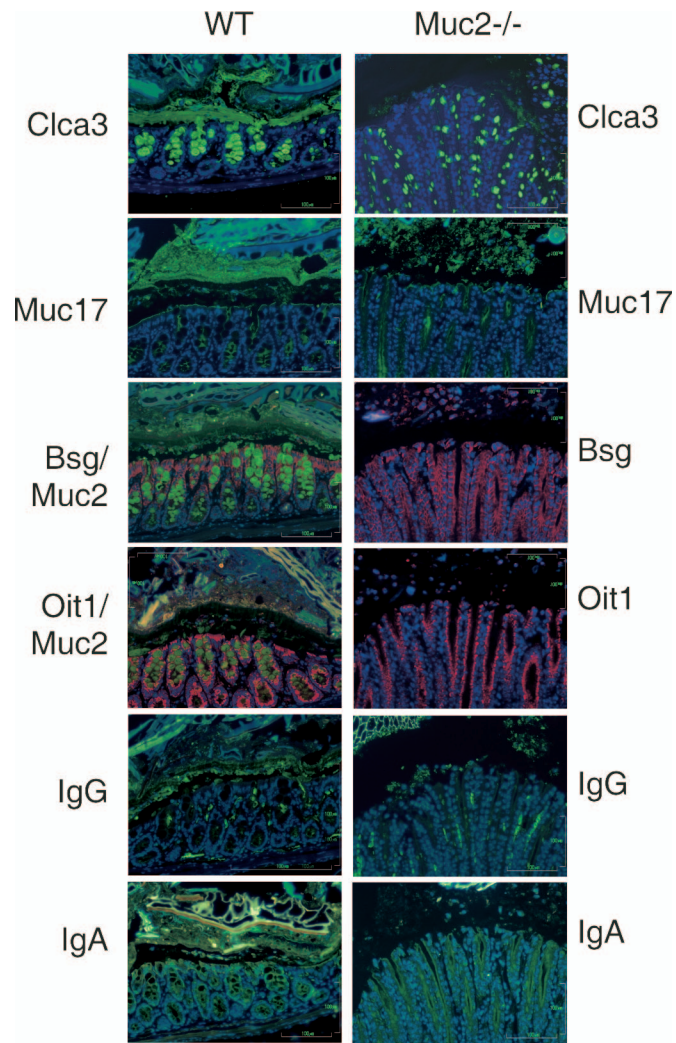

**Fig. S2.** Immunostaining of colon sections from WT and *Muc2*<sup>-/-</sup> mice using antibodies against proteins identified in the mucus by proteomics. The antibodies used are described in Table S3. Double staining with anti-MUC2C3 was performed for Bsg and Oit1 of the WT mice. FITC-conjugated anti-rabbit and Cy3-conjugated anti-goat antibodies were used as secondary antibodies. Clca3, Muc17, Muc2, IgG, and IgA are stained green, whereas Bsg and Oit1 are stained red. The nuclear DNA is stained blue by DAPI in all pictures.

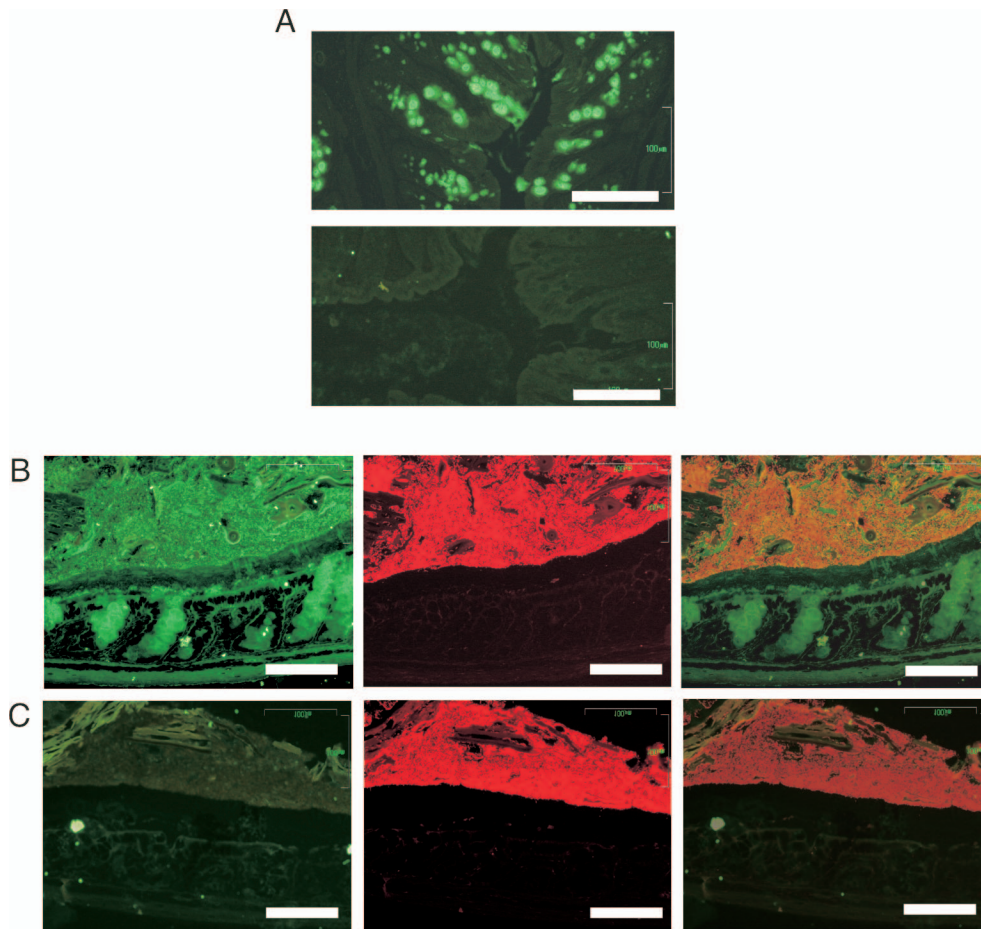

**Fig. S3.** Peptide block of the anti-MUC2C3 antisera. (A) Adjacent colon sections were immunostained with the anti-MUC2C3 antisera and FITC-conjugated secondary antibody (*Upper*) or pretreated with 10  $\mu\text{g}$  of the immune-specific peptide per section for 30 min, abolishing the staining (*Lower*). (B) Immunostaining with anti-MUC2C3 antisera and FITC-conjugated (green, *Left*) secondary antibody combined with FISH using the EUB338-Alexa Fluor 555 probe (red, *Center*) and the composite of these (*Right*). (C) Peptide block of the anti-MUC2C3 antisera before staining preformed as in B. (Scale bars, 100  $\mu\text{m}$ .)

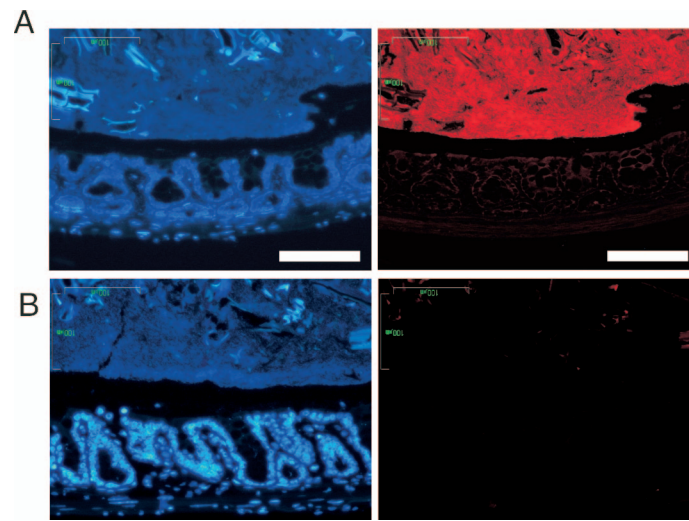

**Fig. 54.** Controls for *in situ* hybridization for bacterial 16S rRNA. (A) DAPI staining of epithelial cell nuclear DNA and bacterial DNA (Left) and stained with FISH using the EUB338-Alexa Fluor 555 probe (red, Right). Sections are from the distal colon. Double staining is seen in bacteria. (B) DAPI staining of epithelial cell nuclear DNA and bacterial DNA (Left) and stained with FISH using the negative control NON-EUB-Alexa Fluor 555 probe (5'-CGACGGAGGGCATCCTCA-3') (red, Right). Staining was performed as in A. (Scale bars, 100  $\mu\text{m}$ .)

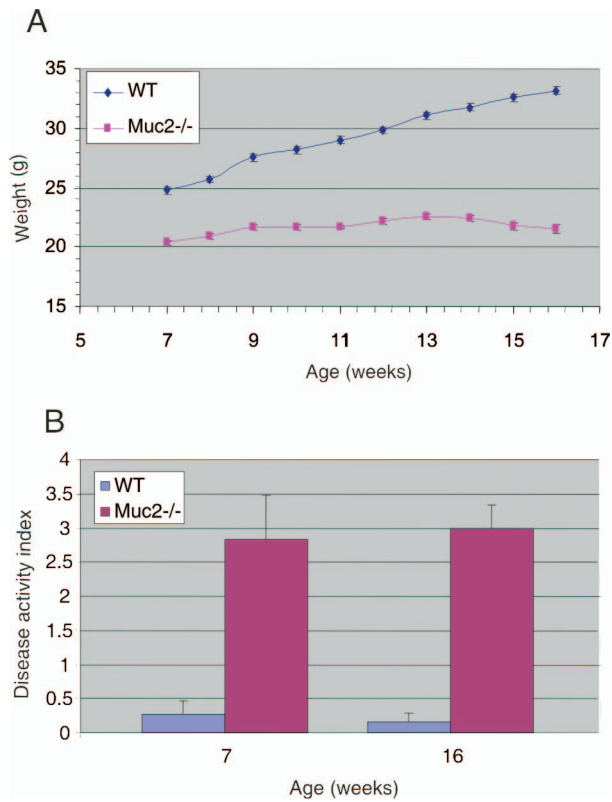

**Fig. S5.** Weight development and disease activity index of WT and Muc2<sup>-/-</sup> mice. (A) The weight was observed over time for Muc2<sup>-/-</sup> mice and compared with WT. The groups included five male mice, and data are presented as mean  $\pm$  SEM. (B) The same animal groups as in A were also compared by scoring diarrhea and blood in stool, and the disease activity index was calculated (1). Data from weeks 7 and 16 are presented as mean  $\pm$  SEM.

1. Cooper HS, Murthy SNS, Shah RS, Sedergran DJ (1993) Clinicopathologic study of dextran sulfate sodium experimental murine colitis. *Lab Invest* 69:238–249.

Table S1. Peptides identifying mucins in the loose and firm mucus layers

| Peptide*                  | Observed mass, Da                                                                  | Charge  | Loose              |                    | Firm               |                    |
|---------------------------|------------------------------------------------------------------------------------|---------|--------------------|--------------------|--------------------|--------------------|
|                           |                                                                                    |         | MS/MS <sup>†</sup> | Score <sup>‡</sup> | MS/MS <sup>†</sup> | Score <sup>‡</sup> |
| Muc2                      |                                                                                    |         |                    |                    |                    |                    |
| NHVCSTWGFHYK              | 556.92 <sup>§</sup>                                                                | 3       | 2                  | 30                 | 1                  | 9                  |
| TFDGDVYR                  | 486.72                                                                             | 2       | 9                  | 40                 | 11                 | 37                 |
| FPGLCDYNAFASDCR           | 606.6 <sup>§</sup> ;861.35 <sup>¶</sup>                                            | 3;2     | 1                  | 16                 | 4                  | 65                 |
| DSYKEFAVHLK               | 446.23                                                                             | 3       | 3                  | 35                 | 4                  | 51                 |
| DDTIYLTHK                 | 553.28                                                                             | 2       | 1                  | 24                 |                    |                    |
| LAVVNGAMVSTPHYSSGLLIEK    | 768.08                                                                             | 3       | 1                  | 4                  | 1                  | 35                 |
| AGLSLMVNR                 | 532.27                                                                             | 2       | 4                  | 61                 | 2                  | 56                 |
| EDALMVELDSR               | 647.3                                                                              | 2       | 2                  | 60                 | 2                  | 60                 |
| INKPEVQCEDPEAVQEPESCSSEHR | 956.42 <sup>¶</sup>                                                                | 3       |                    |                    | 3                  | 42                 |
| LLTSAAFEDCQTR             | 780.38 <sup>§</sup> ;520.59 <sup>§</sup> ;756.36 <sup>¶</sup>                      | 2;3;2   | 15                 | 90                 | 17                 | 76                 |
| VPVESYVR                  | 474.76                                                                             | 2       | 14                 | 49                 | 21                 | 49                 |
| GGACECSTLAEFSR            | 820.86 <sup>§</sup> ;547.58 <sup>§</sup> ;772.83 <sup>¶</sup>                      | 2;3;2   | 11                 | 72                 | 11                 | 71                 |
| QCSHAGGRPENWR             | 518.90 <sup>¶</sup>                                                                | 3       |                    |                    | 1                  | 6                  |
| TASLCPK                   | 412.72 <sup>§</sup>                                                                | 2       | 6                  | 32                 | 2                  | 30                 |
| DLPCPETCALEGGSHITTFDGKK   | 834.39 <sup>§</sup> ;845.06 <sup>¶</sup>                                           | 3;3     |                    |                    | 3                  | 15                 |
| KFTFHGDCYYVLTG            | 609.63 <sup>§</sup>                                                                | 3       |                    |                    | 1                  | 28                 |
| FTFHGDCYYVLTG             | 566.94 <sup>§</sup>                                                                | 3       | 3                  | 21                 | 2                  | 21                 |
| TVVLLTDDK                 | 502.29                                                                             | 2       | 2                  | 32                 |                    |                    |
| TVVLLTDDKK                | 566.33                                                                             | 2       | 8                  | 40                 | 11                 | 45                 |
| RSETPFAR                  | 482.25                                                                             | 2       | 8                  | 40                 | 4                  | 38                 |
| SETPFAR                   | 404.2                                                                              | 2       | 13                 | 39                 | 12                 | 38                 |
| CHLAVDPTEYYKR             | 567.28 <sup>§</sup> ;551.27 <sup>¶</sup>                                           | 3;3     | 1                  | 49                 | 1                  | 18                 |
| CHLAVDPTEYYK              | 772.37 <sup>§</sup> ;515.25 <sup>§</sup>                                           | 2;3     | 9                  | 44                 | 11                 | 38                 |
| GVMLWGWR                  | 510.76                                                                             | 2       | 1                  | 29                 | 1                  | 34                 |
| SLSEGDSSHCLK              | 640.8 <sup>§</sup> ;427.45 <sup>§</sup> ;616.78 <sup>¶</sup> ;411.52 <sup>¶</sup>  | 2;3;2;3 | 8                  | 48                 | 8                  | 50                 |
| GFAPVEGCGCPDHTFMDEK       | 755.98 <sup>§</sup>                                                                | 3       | 1                  | 5                  | 2                  | 11                 |
| CSCYHHGLYLEAGDVILR        | 753.7                                                                              | 3       |                    |                    | 1                  | 4                  |
| LQCTQVK                   | 462.75 <sup>§</sup> ;438.73 <sup>¶</sup>                                           | 2;2     | 9                  | 29                 | 7                  | 37                 |
| LIGHTCQYPK                | 632.83 <sup>§</sup> ;422.22 <sup>§</sup> ;608.81 <sup>¶</sup> ;406.21 <sup>¶</sup> | 2;3;2;3 | 16                 | 33                 | 15                 | 28                 |
| GGCVEEDKPCIHNK            | 901.88 <sup>¶</sup> ;601.59 <sup>¶</sup>                                           | 2;3     | 1                  | 38                 | 6                  | 47                 |
| DLYSSGESIK                | 549.77                                                                             | 2       | 10                 | 33                 | 11                 | 34                 |
| GRWECTR                   | 482.72 <sup>¶</sup>                                                                | 2       | 1                  | 15                 | 2                  | 26                 |
| IFIGGTELK                 | 489.29                                                                             | 2       | 17                 | 37                 | 20                 | 37                 |
| QLEEGHHVPYITR             | 789.90;526.94                                                                      | 2;3     | 7                  | 28                 | 12                 | 51                 |
| GTVCGLCGNFDDQTK           | 884.39 <sup>§</sup> ;589.93 <sup>§</sup> ;836.36 <sup>¶</sup>                      | 2;3;2   | 10                 | 37                 | 10                 | 75                 |
| GTVCGLCGNFDDQTKNDFTR      | 834.71 <sup>§</sup> ;802.69 <sup>¶</sup>                                           | 3;3     |                    |                    | 4                  | 43                 |
| DHMMVTSSELDVFNQSWK        | 627.62                                                                             | 3       | 1                  | 21                 | 3                  | 23                 |
| EASTCPDVSHNPDPCSLNPHR     | 829.37 <sup>§</sup> ;797.35 <sup>¶</sup>                                           | 3;3     |                    |                    | 4                  | 49                 |
| EASTCPDVSHNPDPCSLNPHRR    | 849.38 <sup>¶</sup>                                                                | 3       |                    |                    | 4                  | 39                 |
| AEACVFWR                  | 543.76 <sup>§</sup> ;519.74 <sup>¶</sup>                                           | 2;2     | 8                  | 40                 | 7                  | 49                 |
| SFETCR                    | 424.19 <sup>§</sup> ;400.17 <sup>¶</sup>                                           | 2;2     | 11                 | 29                 | 9                  | 25                 |
| CPEDRIPIYDEDLK            | 849.39 <sup>§</sup>                                                                | 2       | 1                  | 19                 | 2                  | 16                 |
| CPEDRIPIYDEDLKK           | 860.91;889.42 <sup>¶</sup> ;593.29 <sup>¶</sup>                                    | 2;2;3   | 5                  | 44                 | 12                 | 45                 |
| CGCYIEDTR                 | 423.85 <sup>§</sup>                                                                | 3       | 1                  | 18                 | 1                  | 16                 |
| CGCYIEDTRYPPGGSVPTDEICK   | 892.06 <sup>¶</sup>                                                                | 3       |                    |                    | 6                  | 54                 |
| YPPGGSVPTDEICK            | 784.37 <sup>§</sup> ;523.25 <sup>§</sup>                                           | 2;3     | 8                  | 36                 | 3                  | 24                 |
| IECHPDEGK                 | 566.76 <sup>§</sup> ;542.74 <sup>¶</sup>                                           | 2;2     | 3                  | 26                 | 4                  | 41                 |
| ENGGDRETFTHVCSAPEDICR     | 1290.05 <sup>¶</sup> ;860.37 <sup>¶</sup>                                          | 2;3     | 1                  | 47                 | 3                  | 60                 |
| ETFTHVCSAPEDIECR          | 682.97 <sup>§</sup> ;975.92 <sup>¶</sup> ;650.95 <sup>¶</sup>                      | 3;2;3   | 5                  | 17                 | 7                  | 57                 |
| LSWEELGQK                 | 545.28                                                                             | 2       | 11                 | 64                 | 14                 | 64                 |
| SGDFELIK                  | 454.74                                                                             | 2       | 19                 | 59                 | 22                 | 59                 |
| AVMHSNIPLDQLGQIVVCNK      | 767.40 <sup>§</sup> ;1126.58 <sup>¶</sup> ;751.39 <sup>¶</sup>                     | 3;2;3   | 3                  | 46                 | 20                 | 79                 |
| EVGLVCK                   | 426.74 <sup>§</sup> ;402.72 <sup>¶</sup>                                           | 2;2     | 13                 | 21                 | 15                 | 23                 |
| EVGLVCKNEDQEIGGIIPMR      | 774.39 <sup>§</sup> ;758.38 <sup>¶</sup>                                           | 3;3     |                    |                    | 6                  | 39                 |
| NEDQEIGGIIPMR             | 744.36;496.58                                                                      | 2;3     | 27                 | 65                 | 28                 | 61                 |
| HETQEVQIK                 | 556.29                                                                             | 2       | 11                 | 48                 | 10                 | 47                 |
| MMPIEVEVQVNK              | 724.86                                                                             | 2       | 2                  | 54                 | 6                  | 68                 |
| QLVALPYK                  | 466.28                                                                             | 2       | 5                  | 28                 | 6                  | 32                 |
| QLVALPYKK                 | 530.33                                                                             | 2       | 2                  | 19                 | 2                  | 20                 |
| ISYNGLSFSIR               | 628.84                                                                             | 2       | 1                  | 44                 | 2                  | 49                 |
| FAPGYDVCVK                | 602.30 <sup>§</sup> ;401.87 <sup>§</sup> ;578.28 <sup>¶</sup>                      | 2;3;2   | 8                  | 16                 | 10                 | 24                 |
| TCGCVGPDNVPR              | 476.56 <sup>§</sup> ;666.3 <sup>¶</sup>                                            | 3;2     | 3                  | 36                 | 4                  | 50                 |
| EFGEHFEDCK                | 498.21 <sup>§</sup>                                                                | 3       | 3                  | 20                 | 3                  | 17                 |
| EGSGIVCQPK                | 590.30 <sup>§</sup> ;566.28 <sup>¶</sup>                                           | 2;2     | 7                  | 39                 | 6                  | 50                 |
| AERPTCLLGFEVK             | 784.42 <sup>§</sup> ;523.28 <sup>§</sup>                                           | 2;3     | 2                  | 30                 | 6                  | 32                 |
| GVCVHQNAEYQPGSPVYSNK      | 761.36 <sup>§</sup>                                                                | 3       | 5                  | 45                 | 2                  | 50                 |
| QQYIILKPGEIHK             | 522.97                                                                             | 3       | 3                  | 6                  | 2                  | 8                  |
| VPCSAVVMK                 | 571.29 <sup>§</sup> ;547.27 <sup>¶</sup>                                           | 2;2     | 8                  | 11                 | 7                  | 38                 |
| Muc3(17) <sup>  </sup>    |                                                                                    |         |                    |                    |                    |                    |
| CQCTSLFYGPR               | 694.81 <sup>¶</sup>                                                                | 2       | 1                  | 66                 | 1                  | 65                 |
| Muc13                     |                                                                                    |         |                    |                    |                    |                    |
| SVSSAIETAIK               | 553.31                                                                             | 2       |                    |                    | 2                  | 54                 |

Peptides from the LC-MS/MS identified mucins in loose and firm mucus from AgPAGE separation. Data from nine alcian blue-stained bands from three mucus samples are merged. All matched peptides not better identified in other proteins were included for muc.

\*Oxidized methionins are italicized.

<sup>†</sup>No. of MS/MS spectra.

<sup>‡</sup>Highest individual peptide score observed.

<sup>§</sup>C modification: S-pyridyletyl.

<sup>¶</sup>C modification: carbamidomethyl.

<sup>||</sup>This is the ortholog of human MUC17, annotated as Muc3 in mouse databases.



**Table S2. Identified proteins that are either known to be secreted or that have a large extracellular domain found in the loose and firm mucus layers; proteins known to be present in plasma and all intracellular proteins are excluded**

| AC*          | Protein name                            | Gene            | Mass, Da | Length, amino acids | Loose1           |                  |                  | Loose 2          |                  |                  | Loose 3          |                  |                  | Firm 1           |                  |                  | Firm 2           |                  |                  | Firm 3           |                  |                  |
|--------------|-----------------------------------------|-----------------|----------|---------------------|------------------|------------------|------------------|------------------|------------------|------------------|------------------|------------------|------------------|------------------|------------------|------------------|------------------|------------------|------------------|------------------|------------------|------------------|
|              |                                         |                 |          |                     | Pep <sup>†</sup> | Uni <sup>‡</sup> | Cov <sup>§</sup> | Pep <sup>†</sup> | Uni <sup>‡</sup> | Cov <sup>§</sup> | Pep <sup>†</sup> | Uni <sup>‡</sup> | Cov <sup>§</sup> | Pep <sup>†</sup> | Uni <sup>‡</sup> | Cov <sup>§</sup> | Pep <sup>†</sup> | Uni <sup>‡</sup> | Cov <sup>§</sup> | Pep <sup>†</sup> | Uni <sup>‡</sup> | Cov <sup>§</sup> |
| gil6753010   | Anterior gradient 2                     | <i>Agx2</i>     | 19,979   | 175                 | 3                | 3                | 26               | 4                | 4                | 29               | 3                | 3                | 25               | 6                | 6                | 42               | 6                | 6                | 42               | 6                | 6                | 42               |
| gil8567336   | Ca-activated Cl channelβ3               | <i>Clca3</i>    | 101,003  | 913                 | 30               | 30               | 38               | 29               | 29               | 28               | 22               | 22               | 27               | 22               | 22               | 32               | 25               | 25               | 32               | 25               | 25               | 32               |
| gil50882459  | Ca-activated Cl channelβ6               | <i>Clca6</i>    | 924      | 924                 | 6                | 6                | 7                | 4                | 4                | 7                | 2                | 2                | 2                | 2                | 2                | 2                | 2                | 2                | 2                | 2                | 2                | 2                |
| gil148692210 | IgG Fc binding protein                  | <i>Fcgbp</i>    | 156,416  | 1,398               | 13               | 13               | 12               | 18               | 18               | 11               | 10               | 10               | 8                | 14               | 14               | 13               | 17               | 17               | 16               | 17               | 17               | 16               |
| gil3831564   | γ-Glutamyl hydrolase                    | <i>Ggh</i>      | 35,465   | 315                 |                  |                  |                  | 2                | 2                | 9                |                  |                  |                  | 3                | 3                | 12               | 5                | 5                | 19               |                  |                  | 19               |
| gil473961    | Immunoglobulin light chain              | <i>Ig</i>       | 22,983   | 206                 | 4                | 4                | 1                | 23               |                  |                  |                  |                  |                  |                  |                  |                  |                  |                  |                  |                  |                  |                  |
| gil4930001   | Chain A, Fab–Fab complex                | <i>Ig</i>       | 24,147   | 214                 | 5                | 1                | 26               |                  |                  |                  |                  |                  |                  |                  |                  |                  |                  |                  |                  |                  |                  |                  |
| gil62027409  | IgH protein [ <i>Mus musculus</i> ]     | <i>Igh</i>      | 53,801   | 485                 |                  |                  |                  | 6                | 6                | 17               | 3                | 3                | 8                |                  |                  |                  |                  |                  |                  |                  |                  |                  |
| gil18043871  | IgH protein                             | <i>Igh</i>      | 54,034   | 484                 | 6                | 6                | 23               | 3                | 1                | 8                |                  |                  |                  |                  |                  |                  |                  |                  |                  |                  |                  |                  |
| gil16323017  | Immunoglobulin alpha heavy              | <i>Igh</i>      | 46,927   | 344                 | 6                | 6                | 23               | 4                | 4                | 17               | 4                | 4                | 17               | 4                | 4                | 17               | 2                | 2                | 9                |                  |                  |                  |
| gil37589305  | IgH protein                             | <i>Igh</i>      | 53,646   | 485                 | 3                | 3                | 10               |                  |                  | 5                | 2                | 1                | 5                |                  |                  |                  |                  |                  |                  |                  |                  |                  |
| gil26330510  | IgH protein                             | <i>Igh</i>      | 45,216   | 406                 | 3                | 3                | 10               |                  |                  |                  |                  |                  |                  |                  |                  |                  |                  |                  |                  |                  |                  |                  |
| gil15637214  | IgG1 light chain                        | <i>Igl</i>      | 22,319   | 200                 | 4                | 4                | 1                | 24               |                  |                  |                  |                  |                  |                  |                  |                  |                  |                  |                  |                  |                  |                  |
| gil99032605  | Heavy and light chain variable          | <i>Ighl</i>     | 31,730   | 291                 |                  |                  |                  | 2                | 1                | 9                |                  |                  |                  |                  |                  |                  |                  |                  |                  |                  |                  |                  |
| gil90898     | Igκ chain V region                      | <i>Igk</i>      | 11,881   | 108                 | 2                | 1                | 16               |                  |                  |                  |                  |                  |                  |                  |                  |                  |                  |                  |                  |                  |                  |                  |
| gil13359417  | Antibody κ light chain                  | <i>Igk</i>      | 23,749   | 213                 | 4                | 4                | 2                | 26               |                  |                  |                  |                  |                  |                  |                  |                  |                  |                  |                  |                  |                  |                  |
| gil83405792  | Igκ C protein                           | <i>Igk</i>      | 26,203   | 235                 | 3                | 1                | 15               |                  |                  |                  |                  |                  |                  |                  |                  |                  |                  |                  |                  |                  |                  |                  |
| gil110434    | Igκ chain V region                      | <i>Igk</i>      | 24,556   | 219                 | 4                | 4                | 23               | 3                | 3                | 17               | 2                | 2                | 10               | 2                | 2                | 8                |                  |                  |                  |                  |                  |                  |
| gil6678740   | Lumican                                 | <i>Lum</i>      | 38,824   | 338                 | 2                | 2                | 5                | 2                | 2                | 7                |                  |                  |                  |                  |                  |                  |                  |                  |                  |                  |                  |                  |
| mMuc2        | Muc2                                    | <i>Muc2</i>     | 310,735  | 2,700               | 20               | 20               | 8                | 21               | 21               | 9                | 9                | 9                | 3                | 17               | 17               | 8                | 11               | 11               | 4                |                  |                  |                  |
| gil127531    | Major urinary proteins 11 and 8         | <i>Mup</i>      | 17,762   | 151                 | 11               | 11               | 82               |                  |                  |                  |                  |                  |                  |                  |                  |                  |                  |                  |                  |                  |                  |                  |
| gil22164770  | Oncoprotein-induced transcript 1        | <i>Oit1</i>     | 25,256   | 223                 | 3                | 3                | 20               | 4                | 4                | 30               | 2                | 2                | 9                | 2                | 2                | 9                | 3                | 3                | 13               |                  |                  |                  |
| gil13384888  | Mucosal pentraxin                       | <i>Ptx</i>      | 24,721   | 219                 | 3                | 3                | 20               | 4                | 4                | 30               | 4                | 4                | 30               | 3                | 3                | 20               | 4                | 4                | 30               |                  |                  |                  |
| gil1703832   | Arginyl aminopeptidase                  | <i>Rnpep</i>    | 73,149   | 650                 | 5                | 5                | 9                | 7                | 7                | 15               | 5                | 5                | 10               | 6                | 6                | 11               | 4                | 4                | 8                |                  |                  |                  |
| gil201102    | Seminal vesicle secretory protein IV    | <i>Sx4</i>      | 11,957   | 108                 |                  |                  |                  | 2                | 2                | 25               | 2                | 2                | 44               | 4                | 4                | 8                | 4                | 4                | 9                |                  |                  |                  |
| gil23943876  | Zymogen granule membrane protein 16     | <i>Zg16</i>     | 18,411   | 167                 | 5                | 5                | 37               | 4                | 4                | 32               | 4                | 4                | 32               | 4                | 4                | 45               | 5                | 5                | 52               |                  |                  |                  |
| mMuc3(17)    | Muc3(17)                                | <i>Muc3(17)</i> | 109,960  | 1,024               | 3                | 3                | 4                | 3                | 3                | 4                | 3                | 3                | 4                | 3                | 3                | 4                | 4                | 4                | (1)              |                  |                  | (1)              |
| gil7209584   | Vomeroglandin                           | <i>Dmbt1</i>    | 219,223  | 1,957               | 5                | 5                | 3                | 6                | 6                | 4                | 2                | 2                | 1                |                  |                  | (1)              |                  |                  |                  |                  |                  | (1)              |
| gil458422    | Polymeric immunoglobulin receptor       | <i>Pigr</i>     | 86,678   | 771                 | 5                | 5                | 7                | 5                | 5                | 8                |                  |                  |                  |                  |                  |                  |                  |                  |                  |                  |                  |                  |
| gil12963609  | Quiescin Q6 sulfhydryl oxidase 1        | <i>Qsox1</i>    | 64,220   | 568                 | 2                | 2                | 3                | 2                | 2                | 3                | 2                | 2                | 3                | 2                | 2                | 3                | 3                | 3                | 7                |                  |                  |                  |
| mMuc13       | Muc13                                   | <i>Muc13</i>    | 60,085   | 573                 | 6                | 6                | 13               | 6                | 6                | 13               | 5                | 5                | 11               | 5                | 5                | 10               | 3                | 3                | 6                | 3                | 3                | 7                |
| gil2808470   | Basigin                                 | <i>Bsg</i>      | 30,539   | 275                 | 2                | 2                | 5                | 6                | 6                | 14               | 2                | 2                | 8                | 5                | 5                | 5                | 5                | 5                | 14               |                  |                  |                  |
| gil55151     | Uvomorulin                              | <i>Cdh1</i>     | 78,611   | 711                 | 2                | 2                | 5                | 6                | 6                | 14               | 2                | 2                | 4                | 3                | 3                | 6                | 5                | 5                | 14               |                  |                  |                  |
| gil9790073   | Cadherin 17                             | <i>Cdh17</i>    | 92,157   | 827                 | 12               | 12               | 19               | 16               | 16               | 25               | 18               | 18               | 26               | 7                | 7                | 11               | 19               | 19               | 33               |                  |                  |                  |
| gil399117    | CEACAM 1                                | <i>Ceacam1</i>  | 57,407   | 521                 | 3                | 3                | 8                | 2                | 2                | 6                | 3                | 3                | 5                | 3                | 3                | 33               | 22               | 22               | 34               |                  |                  |                  |
| gil6754180   | Hephaestin                              | <i>Heph</i>     | 130,736  | 1,157               |                  |                  |                  |                  |                  |                  | 2                | 2                | 1                |                  |                  |                  |                  |                  |                  |                  |                  |                  |
| gil21312502  | Mucin-like protocadherin                | <i>Mupcdh</i>   | 73,068   | 669                 | 3                | 3                | 4                | 5                | 5                | 11               | 4                | 4                | 6                | 2                | 2                | 3                | 2                | 2                | 4                | 3                | 3                | 3                |
| gil9992880   | Nicastrin                               | <i>Ncstrn</i>   | 79,292   | 708                 |                  |                  |                  | 3                | 3                | 5                | 2                | 2                | 2                | 2                | 2                | 3                | 2                | 2                | 4                | 2                | 2                | 3                |
| gil85662397  | Protocadherin 24                        | <i>Pcdh24</i>   | 143,399  | 1,308               | 2                | 2                | 2                | 4                | 4                | 3                | 6                | 6                | 5                | 2                | 2                | 2                | 2                | 2                | 2                | 2                | 2                | 2                |
| gil193008    | Tumor-associated Ca signal transducer 1 | <i>Tacst1</i>   | 35,778   | 314                 | 3                | 3                | 18               |                  |                  |                  |                  |                  |                  |                  |                  |                  |                  |                  |                  |                  |                  |                  |
| gil82802624  | Maltase-glucoamylase                    | <i>Mgam</i>     | 26,5920  | 2,379               |                  |                  |                  | 3                | 3                | 1                | 4                | 4                | 1                |                  |                  | (1)              |                  |                  |                  |                  |                  | (1)              |

Databasesearches using the Mascot software in NCBI nonredundant (October 11, 2007, 5,539,440 sequences) and mucin ([www.medkern.gu.se/mucinbiology](http://www.medkern.gu.se/mucinbiology)) databases are combined. Identification: One peptide at 99% significance level (individual peptide score cutoff = 47) and one supporting peptide at 95% significance level (individual peptide score cutoff = 40). Proteins identified in only loose or firm were further analyzed for peptides with ion score cutoff = 25 (marked by parentheses). Multiple entries for the same protein were combined, and identification in two of three analyses of at least one sample (loose or firm) was required for inclusion. All identified proteases are presented in Table S4.

\*Accession number in the NCBI protein database.  
<sup>†</sup>Pep is the number of peptides identified with individual ion score cutoff >40 ( $P > 0.05$ ).  
<sup>‡</sup>Uni is the number of unique peptides identified for the protein. The + indicates identification of the protein in other species; (, ) number of peptides identified with ion score = 25 (analyzed for samples where listed proteins were not identified at  $P > 0.05$ ).  
<sup>§</sup>Cov is the sequence coverage of the peptides for the identified protein sequence.

**Table S3. Analysis of localization, function, and expression of proteins identified in the loose and firm mucus by proteomics as shown in Table S2**

| AC*          | Protein name                          | Gene            | Loc <sup>†</sup> | GO term (function, biological process) <sup>‡</sup>                                                                                                                                        | Gene expr <sup>§</sup> | Hpa <sup>  </sup> | Ab <sup>  </sup> | Ab staining**   |
|--------------|---------------------------------------|-----------------|------------------|--------------------------------------------------------------------------------------------------------------------------------------------------------------------------------------------|------------------------|-------------------|------------------|-----------------|
| gi 6753010   | Anterior gradient 2                   | <i>Agr2</i>     | SEC              | Cl channel activity, hydrogen ion transporting ATPase activity, rotational mechanism, chloride transport                                                                                   | LI, SI                 | n.d.              | -                |                 |
| gi 8567336   | Ca-activated Cl channel $\beta$ 3     | <i>Clca3</i>    | SEC              | Cl channel activity, ligand-gated ion channel activity, chloride transport                                                                                                                 | LI, SI                 | n.d.              | AbCam46512       | GC, M, Lum      |
| gi 50882459  | Ca-activated Cl channels              | <i>Clca6</i>    | SEC              | Cl channel activity, ligand-gated ion channel activity, chloride transport                                                                                                                 | LI, SI                 | No ortholog       | -                |                 |
| gi 148692210 | IgG Fc binding protein                | <i>Fcgbp</i>    | SEC              | Binding of sperm to zona pellucida, cell adhesion                                                                                                                                          | LI, SI                 | LI, SI            | -                |                 |
| gi 3831564   | $\gamma$ -Glutamyl hydrolase          | <i>Ggh</i>      | SEC              | $\gamma$ -Glutamyl hydrolase activity                                                                                                                                                      | LI                     | n.d.              | -                |                 |
| gi 473961    | Immunoglobulin light chain            | <i>Igl</i>      | SEC              |                                                                                                                                                                                            | LI, SI                 | n.d.              | INV_A11001 (IgG) | LPC, M, Lum     |
| gi 4930001   | Chain A,Fab-Fab complex               | <i>Igl</i>      | SEC              |                                                                                                                                                                                            | LI, SI                 | n.d.              | BD 559354 (IgA)  | EC, M, Lum      |
| gi 62027409  | IgH protein                           | <i>Igh</i>      | SEC              |                                                                                                                                                                                            | LI, SI                 | n.d.              | -                |                 |
| gi 18043871  | IgH protein [ <i>Mus musculus</i> ]   | <i>Igh</i>      | SEC              |                                                                                                                                                                                            | LI, SI                 | n.d.              | -                |                 |
| gi 16323017  | IgH protein                           | <i>Igh</i>      | SEC              |                                                                                                                                                                                            | LI, SI                 | n.d.              | -                |                 |
| gi 37589305  | Immunoglobulin- $\alpha$ heavy        | <i>Igh</i>      | SEC              |                                                                                                                                                                                            | LI, SI                 | n.d.              | -                |                 |
| gi 26330510  | IgH protein                           | <i>Igh</i>      | SEC              |                                                                                                                                                                                            | LI, SI                 | n.d.              | -                |                 |
| gi 15637214  | IgG1 light chain                      | <i>Igl</i>      | SEC              |                                                                                                                                                                                            | LI, SI                 | n.d.              | -                |                 |
| gi 99032605  | Heavy And light chain variable        | <i>Ighl</i>     | SEC              |                                                                                                                                                                                            | LI, SI                 | n.d.              | -                |                 |
| gi 90898     | Igk chain V region                    | <i>Igk</i>      | SEC              |                                                                                                                                                                                            | LI, SI                 | n.d.              | -                |                 |
| gi 13359417  | antibody kappa light chain            | <i>Igk</i>      | SEC              |                                                                                                                                                                                            | LI, SI                 | n.d.              | -                |                 |
| gi 83405792  | Igk-C protein                         | <i>Igk</i>      | SEC              |                                                                                                                                                                                            | LI, SI                 | n.d.              | -                |                 |
| gi 110434    | Igk chain V region                    | <i>Igk</i>      | SEC              |                                                                                                                                                                                            | LI, SI                 | n.d.              | -                |                 |
| gi 6678740   | Lumican                               | <i>Lum</i>      | SEC              |                                                                                                                                                                                            | LI                     | n.d.              | -                |                 |
| mMuc2        | Mucin2                                | <i>Muc2</i>     | SEC              | Protein binding, apoptosis, induction of apoptosis, negative regulation of cell migration, negative regulation of cell proliferation                                                       | n.d.                   | LI, SI            | anti-MUC2C3      | GC, M, Lum      |
| gi 127531    | Major urinary proteins 11 and 8       | <i>Mup</i>      | SEC              | Negative regulator of insulin secretion                                                                                                                                                    | n.d.                   | No ortholog       | -                |                 |
| gi 22164770  | Oncoprotein induced transcript 1      | <i>Oit1</i>     | SEC              |                                                                                                                                                                                            | LI, SI                 | n.d.              | RD AF3027        | Ep, M           |
| gi 13384888  | Mucosal pentraxin                     | <i>Ptx</i>      | SEC              |                                                                                                                                                                                            | n.d.                   | n.d.              | -                |                 |
| gi 21703832  | Arginyl aminopeptidase                | <i>Rnpep</i>    | SEC              | Aminopeptidase activity, hydrolase activity, membrane alanyl aminopeptidase activity, metalloproteinase activity, proteolysis                                                              | LI, SI                 | n.d.              | -                |                 |
| gi 201102    | Seminal vesicle secretory protein IV  | <i>Svs4</i>     | SEC              |                                                                                                                                                                                            | NO                     | No ortholog       | -                |                 |
| gi 23943876  | Zymogen granule membrane protein 16   | <i>Zg16</i>     | SEC              |                                                                                                                                                                                            | LI, SI                 | n.d.              | -                |                 |
| mMuc3(17)    | Mucins(17)                            | <i>Muc3(17)</i> | SEC-TM1          | Blastocyst development, inner cell mass cell proliferation, positive regulation of epithelial cell differentiation                                                                         | LI, SI <sup>††</sup>   | n.d.              | anti-Muc3(17)-S2 | Ep, Mem, M, Lum |
| gi 7209584   | Vomeroglandin                         | <i>Dmbt1</i>    | SEC-TM1          |                                                                                                                                                                                            | LI, SI                 | n.d.              | -                |                 |
| gi 458422    | Polymeric immunoglobulin receptor     | <i>Pigr</i>     | SEC-TM1          | Flavin-linked sulfhydryl oxidase activity                                                                                                                                                  | LI, SI                 | LI, SI            | -                |                 |
| gi 12963609  | Quiescin Q6 sulfhydryl oxidase 1      | <i>Oxol1</i>    | SEC-TM1          |                                                                                                                                                                                            | LI (SI)                | n.d.              | -                |                 |
| mMuc13       | Mucin13                               | <i>Muc13</i>    | TM1              | Protein binding, apoptosis, induction of apoptosis, negative regulation of cell migration, negative regulation of cell proliferation                                                       | LI, SI                 | n.d.              | -                |                 |
| gi 2808470   | Basigin                               | <i>Bsg</i>      | TM1              | Cell-cell adhesion, protein homooligomerization, protein metabolic process, regulation of caspase activity                                                                                 | LI, SI                 | n.d.              | RD AF772         | Ep, Mem         |
| gi 55151     | Uvomorulin                            | <i>Cdhl1</i>    | TM1              | Protein binding, proton-dependent oligopeptide secondary active transmembrane transporter activity, calcium-dependent cell-cell adhesion, homophilic cell adhesion, oligopeptide transport | LI, SI                 | LI, (SI)          | -                |                 |
| gi 9790073   | Cadherin 17                           | <i>Cdh17</i>    | TM1              | Positive regulation of MAP kinase activity                                                                                                                                                 | LI, SI                 | LI, SI            | -                |                 |
| gi 399117    | CEACAM 1                              | <i>Ceacam1</i>  | TM1              | Erythrocyte differentiation, iron ion transport                                                                                                                                            | LI, SI                 | n.d.              | -                |                 |
| gi 6754180   | Hephaestin                            | <i>Heph</i>     | TM1              | Homophilic cell, calcium ion binding                                                                                                                                                       | LI, SI                 | n.d.              | -                |                 |
| gi 21312502  | Mucin-like protocadherin              | <i>Mucadh</i>   | TM1              | Protein binding                                                                                                                                                                            | LI, SI                 | n.d.              | -                |                 |
| gi 992880    | Nicastrin                             | <i>Ncstrn</i>   | TM1              | Extracellular space, integral to membrane                                                                                                                                                  | n.d.                   | n.d.              | -                |                 |
| gi 85662397  | Protocadherin 24                      | <i>Pcdh24</i>   | TM1              | $\alpha$ -Glucosidase activity, amylase activity                                                                                                                                           | LI, SI                 | LI, SI            | -                |                 |
| gi 193008    | Tumor-associated Ca signal transducer | <i>Tacstd1</i>  | TM1              |                                                                                                                                                                                            | LI, (LI)               | SI                | -                |                 |
| gi 82802624  | Maltase-glucoamylase                  | <i>Mgaim</i>    | TM2              |                                                                                                                                                                                            |                        |                   | -                |                 |

\*Accession number in the NCBI protein database.

<sup>†</sup>Localization (UniProtKB). SEC, secreted; TM1, transmembrane type1; TM2, transmembrane type2.

<sup>‡</sup>Gene Ontology terms for molecular function and biological process.

<sup>§</sup>Mouse gene expression from the GNF SymAtlas. LI, large intestine; SI, small intestine; NO, no expression; nd, not done.

<sup>||</sup>Human protein expression from the Human protein atlas. LI, large intestine; SI, small intestine; NO, no expression; nd, not done.

<sup>||</sup>Antibodies used for immunostaining. SC, Santa Cruz; BD, Becton Dickinson; RD, R and D; INV, Invitrogen; Anti Muc3(17)-S2 [Malmberg EK, et al. (2006) Increased levels of mucins in the cystic fibrosis mouse small intestine, and modulator effects of the Muc1 mucin expression. *Am J Physiol* 291:G203-G210].

\*\*Result of immunostaining. Data are presented in Fig. S5. Ep, epithelial cell; GC, goblet cells; LPC, lamina propria cells; MEM, membrane-associated; M, mucus-associated; Lum, lumen.

<sup>††</sup>Muc3 in GNF SymAtlas.



Table S4. All proteins with identified proteolytic activity found by proteomics in the loose and firm mucus layers; protein identification was as in Table S2

| AC*         | Protein name                            | Gene   | Loc <sup>t</sup> | Mass, Da | Length,<br>amino acids | Loose1           |                  |                  | Loose2           |                  |                  | Loose3           |                  |                  | Firm1            |                  |                  | Firm2            |                  |                  | Firm3            |                  |                  |                  |
|-------------|-----------------------------------------|--------|------------------|----------|------------------------|------------------|------------------|------------------|------------------|------------------|------------------|------------------|------------------|------------------|------------------|------------------|------------------|------------------|------------------|------------------|------------------|------------------|------------------|------------------|
|             |                                         |        |                  |          |                        | Pep <sup>†</sup> | Uni <sup>§</sup> | Cov <sup>¶</sup> | Pep <sup>†</sup> | Uni <sup>§</sup> | Cov <sup>¶</sup> | Pep <sup>†</sup> | Uni <sup>§</sup> | Cov <sup>¶</sup> | Pep <sup>†</sup> | Uni <sup>§</sup> | Cov <sup>¶</sup> | Pep <sup>†</sup> | Uni <sup>§</sup> | Cov <sup>¶</sup> | Pep <sup>†</sup> | Uni <sup>§</sup> | Cov <sup>¶</sup> | Pep <sup>†</sup> |
| gil22122789 | Acylpeptide hydrolase                   | Apeh   | IC               | 8,0991   | 717                    | 7                | 7                | 11               | 7                | 7                | 12               |                  |                  |                  |                  |                  |                  |                  |                  |                  |                  |                  |                  |                  |
| gil23271646 | Bleomycin hydrolase                     | Blmh   | IC               | 53,230   | 455                    | 3                | 3                | 8                | 2                | 2                | 5                | 3                | 3                | 8                |                  |                  |                  |                  |                  |                  |                  |                  |                  |                  |
| gil476218   | Interleukin-1 $\beta$ converting enzyme | Casp1  | IC               | 46,022   | 399                    | 2                | 2                | 5                | 3                | 3                | 7                | 6                | 6                | 16               | 2                | 2                | 5                | 2                | 2                | 2                | 5                | 3                | 3                | 9                |
| gil31981273 | CNDP dipeptidase 2                      | Cndp2  | IC               | 53,302   | 475                    | 7                | 7                | 17               | 10               | 10               | 28               | 7                | 7                | 19               | 6                | 6                | 15               | 3                | 3                | 3                | 8                | 4                | 4                | 11               |
| gil31560449 | Aspartyl aminopeptidase                 | Dnpep  | IC               | 52,884   | 473                    |                  |                  |                  | 3                | 3                | 7                | 4                | 4                | 11               | 3                | 3                | 8                | 4                | 4                | 4                | 13               | 2                | 2                | 4                |
| gil3831564  | $\gamma$ -Glutamyl hydrolase            | Ggh    | SEC              | 35,465   | 315                    |                  |                  |                  | 2                | 2                | 9                |                  |                  |                  |                  |                  |                  |                  |                  |                  |                  |                  |                  |                  |
| gil9989702  | Kallikrein                              | Klk    | SEC-<br>Blood    | 29,495   | 261                    | 6                | 6                | 31               | 6                | 6                | 33               | 8                | 8                | 38               | 3                | 3                | 15               | 2                | 2                | 2                | 8                | 3                | 3                | 17               |
| gil31981147 | Leucine aminopeptidase 3                | Lap3   | IC               | 56,647   | 519                    | 4                | 4                | 8                | 4                | 4                | 8                | 3                | 3                | 6                | 3                | 3                | 3                | 3                | 3                | 3                | 5                | 2                | 2                | 4                |
| gil68226731 | Aminopeptidase puromycin sensitive      | Npepps | IC               | 104,112  | 920                    | 8                | 8                | 9                | 9                | 9                | 11               | 4                | 4                | 4                | 3                | 3                | 3                | 6                | 6                | 6                | 7                | 3                | 3                | 3                |
| gil790470   | p38-2G4                                 | Pa2 g4 | IC               | 38,303   | 340                    | 3                | 3                | 9                | 5                | 5                | 15               | 2                | 2                | 5                | 4                | 4                | 11               | 3                | 3                | 3                | 8                | 6                | 6                | 17               |
| gil55741460 | DJ-1 protein                            | Par-k7 | IC               | 20,293   | 189                    | 4                | 4                | 38               | 5                | 5                | 41               | 7                | 7                | 48               | 5                | 5                | 5                | 5                | 5                | 43               | 3                | 3                | 22               |                  |
| gil28570174 | Plasma glutamate carboxypeptidase       | Pgcp   | SEC-<br>Blood    | 51,851   | 470                    |                  |                  |                  |                  |                  |                  |                  |                  |                  |                  |                  |                  |                  |                  |                  |                  |                  |                  |                  |
| gil6755152  | Prolyl endopeptidase                    | Prep   | IC               | 81,908   | 710                    | 2                | 2                | 3                | 2                | 2                | 3                |                  |                  |                  |                  |                  |                  |                  |                  |                  |                  |                  |                  |                  |
| gil1709759  | Proteasome subunit $\alpha$ type 2      | Psma2  | IC               | 26,051   | 234                    |                  |                  |                  | 4                | 4                | 31               |                  |                  |                  |                  |                  |                  |                  |                  |                  |                  |                  |                  |                  |
| gil6755196  | Proteasome subunit $\alpha$ type 4      | Psma4  | IC               | 29,807   | 261                    | 2                | 2                | 6                | 3                | 3                | 15               | 2                | 2                | 6                | 2                | 2                | 6                |                  |                  |                  |                  |                  |                  |                  |
| gil7106387  | Proteasome subunit $\alpha$ type 5      | Psma5  | IC               | 26,607   | 241                    | 2                | 2                | 14               | 2                | 2                | 9                | 2                | 2                | 9                | 2                | 2                | 9                | 2                | 2                | 2                | 12               | 2                | 2                | 9                |
| gil6755198  | Proteasome subunit $\alpha$ type 6      | Psma6  | IC               | 27,923   | 246                    | 3                | 3                | 16               | 5                | 5                | 25               | 2                | 2                | 9                | 2                | 2                | 8                | 2                | 2                | 2                | 9                | 2                | 2                | 12               |
| gil7106389  | Proteasome subunit $\alpha$ type 7      | Psma7  | IC               | 28,099   | 248                    | 2                | 2                | 10               | 3                | 3                | 18               | 2                | 2                | 10               | 2                | 2                | 10               | 3                | 3                | 3                | 13               | 4                | 4                | 22               |
| gil7242197  | Proteasome subunit $\beta$ type 1       | Psmb1  | IC               | 26,639   | 240                    |                  |                  |                  |                  |                  |                  | 3                | 3                | 20               |                  |                  |                  |                  |                  |                  |                  |                  |                  |                  |
| gil31981327 | Proteasome subunit $\beta$ type 2       | Psmb2  | IC               | 23,065   | 201                    | 2                | 2                | 10               | 2                | 2                | 10               |                  |                  |                  |                  |                  |                  |                  |                  |                  |                  |                  |                  |                  |
| gil9910832  | Proteasome subunit $\beta$ type 2       | Psmb2  | IC               | 23,105   | 201                    |                  |                  |                  |                  |                  |                  | 4                | 4                | 26               |                  |                  |                  |                  |                  |                  |                  |                  |                  |                  |
| gil6755202  | Proteasome subunit $\beta$ type 2       | Psmb3  | IC               | 23,305   | 205                    |                  |                  |                  | 3                | 3                | 23               |                  |                  |                  | 2                | 2                | 16               |                  |                  |                  |                  |                  |                  |                  |
| gil14198355 | Proteasome subunit, $\beta$ type 4      | Psmb4  | IC               | 29,255   | 264                    |                  |                  |                  | 2                | 2                | 13               |                  |                  |                  | 2                | 2                | 15               | 2                | 2                | 2                | 15               | 2                | 2                | 15               |
| gil3914434  | Proteasome subunit $\beta$ type 5       | Psmb5  | IC               | 23,166   | 209                    | 3                | 3                | 16               | 3                | 3                | 16               | 7                | 7                | 39               |                  |                  |                  |                  |                  |                  |                  |                  |                  |                  |
| gil31982099 | Proteasome subunit $\beta$ type 6       | Psmb6  | IC               | 22,051   | 202                    |                  |                  |                  | 3                | 3                | 14               | 4                | 4                | 19               | 4                | 4                | 19               | 3                | 3                | 3                | 14               | 3                | 3                | 14               |
| gil21703832 | Arginyl aminopeptidase                  | Rnpep  | SEC              | 73,149   | 650                    | 5                | 5                | 9                | 7                | 7                | 15               | 5                | 5                | 10               | 6                | 6                | 11               | 4                | 4                | 4                | 8                | 4                | 4                | 9                |
| gil21619359 | Thimet oligopeptidase 1                 | Thop1  | IC               | 78,972   | 687                    | 5                | 5                | 9                | 4                | 4                | 7                | 3                | 3                | 5                |                  |                  |                  |                  |                  |                  |                  |                  |                  |                  |
| gil7305619  | Ubiquitin-specific protease 5           | Usp5   | IC               | 96,909   | 858                    |                  |                  |                  |                  |                  |                  |                  |                  |                  |                  |                  |                  |                  |                  |                  |                  |                  |                  |                  |

\*Accession number in the NCBI protein database.

<sup>t</sup>Localization (UniprotKB). IC, intracellular; SEC, secreted; Blood, plasma protein.<sup>†</sup>Pep is the number of peptides identified with individual ion score cutoff  $>40$  ( $P > 0.05$ ).<sup>§</sup>Uni is the number of unique peptides identified for the protein.<sup>¶</sup>Cov is the sequence coverage of the peptides for the identified protein sequence.
